# Supplementary material for: Spatiotemporal Distribution of Homogalacturonans and Hemicelluloses in the Placentas, Ovules and Female Gametophytes of Utricularia nelumbifolia during Pollination
Source: MDPI journal article supplement (doi:10.3390/cells11030475), 2022-01-29
Supplement: s1 [file s1]

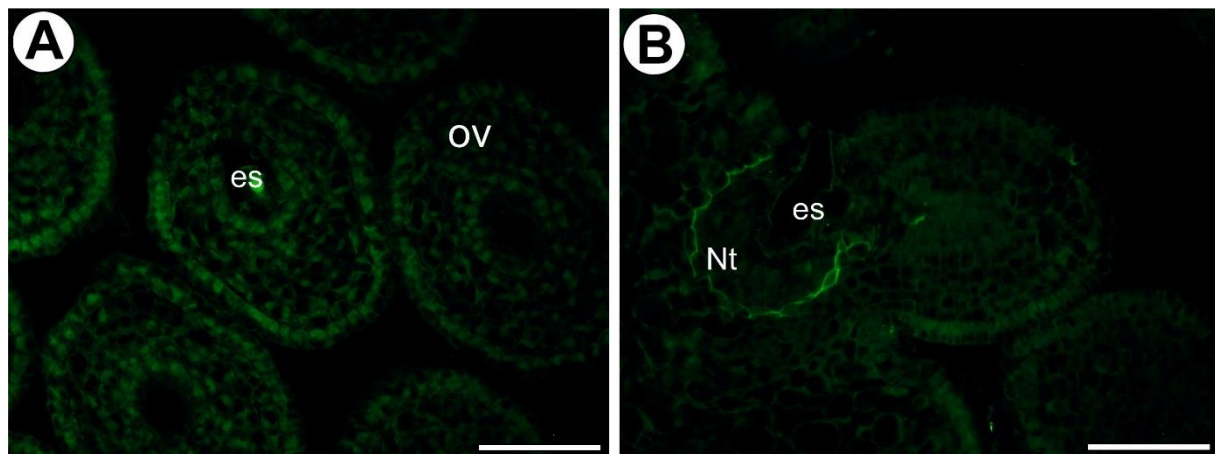

**Figure S1.** Control reactions of the immunolabeling of the cell wall components. (A,B) ovule (ov), embryo sac (es), placental nutritive tissue (Nt), bars 50  $\mu$ m.
